# Supplementary material for: Intestinal fatty acid binding protein is associated with coronary artery disease in long-term type 1 diabetes—the Dialong study
Source: PubMed Central journal article supplement (PMC11575117; doi:10.1186/s12933-024-02509-3), 2024-11-19
Supplement: 12933_2024_2509_MOESM1_ESM.pdf [file 12933_2024_2509_MOESM1_ESM.pdf]

**Supplementary table 1:** Simple and multiple regression models for the association between I-FABP and CAC score in the diabetes group.  $r^2 = 0.496$ .  $n = 86$ .

| CAC score (ln)                              | B    | Unadjusted 95 % CI | P value | B    | Adjusted 95 % CI | P value |
|---------------------------------------------|------|--------------------|---------|------|------------------|---------|
| I-FABP                                      | 2.50 | (1.31-4.76)        | 0.006   | 2.33 | (1.30-4.15)      | 0.005   |
| Age                                         | 1.16 | (1.08-1.24)        | < 0.001 | 1.13 | (1.05-1.21)      | 0.001   |
| Sex                                         | 3.65 | (1.28-10.40)       | 0.016   | 3.23 | (1.34-7.81)      | 0.010   |
| Persistent albuminuria                      | 3.82 | (0.91-16.06)       | 0.067   | 3.03 | (0.93-9.81)      | 0.065   |
| LDL-c, mean time-weighted                   | 2.96 | (1.24-7.08)        | 0.015   | 1.95 | (0.94-4.02)      | 0.072   |
| HbA <sub>1c</sub> , mean time-weighted      | 1.17 | (0.57-2.40)        | 0.659   | 0.96 | (0.52-1.76)      | 0.891   |
| Systolic blood pressure, mean time-weighted | 1.09 | (1.03-1.14)        | 0.001   | 1.01 | (0.97-1.06)      | 0.632   |
| eGFR                                        | 0.99 | (0.96-1.02)        | 0.473   | 1.01 | (0.98-1.03)      | 0.649   |
| Statin treatment                            | 5.76 | (2.08-15.94)       | < 0.001 | 2.74 | (1.13-6.69)      | 0.027   |
| Diabetes duration                           | 1.24 | (1.11-1.39)        | < 0.001 | 1.08 | (0.97-1.20)      | 0.181   |

**Supplementary table 2:** Odds ratios (OR) and 95% confidence interval (CI) of significant stenosis on CT (>50%) or obstructive CAD/CHD, unadjusted and adjusted models, in the diabetes group.

Model 1: Adjusted for age, sex, persistent albuminuria, LDL-c mean time-weighted, HbA1c mean time-weighted, systolic blood pressure mean time-weighted, eGFR, statin treatment and diabetes duration.

|                                                                     |         | I-FABP ng/ml |                  | P value |
|---------------------------------------------------------------------|---------|--------------|------------------|---------|
| Significant stenosis on CT / nonsignificant stenosis on CT (n = 87) | Unadj   | OR (95 % CI) | 2.27 (1.20-4.30) | 0.012   |
|                                                                     | Model 1 | OR (95 % CI) | 3.19 (1.33-7.67) | 0.009   |
| Obstructive CAD/CHD / not obstructive CAD/CHD (n = 102)             | Unadj   | OR (95 % CI) | 2.25 (1.31-3.84) | 0.003   |
|                                                                     | Model 1 | OR (95 % CI) | 2.32 (1.09-4.95) | 0.029   |

**Supplementary table 3:** Coefficients of correlations (Spearman's rho) of I-FABP with cardiovascular risk factors. \*Significant at the 0.05 level. \*\*Significant at the 0.01 level.

|                                                    | <b>I-FABP (ng/ml)</b>      |                     |
|----------------------------------------------------|----------------------------|---------------------|
|                                                    | Type 1 diabetes<br>r-value | Controls<br>r-value |
| <b>Age</b>                                         | 0.038                      | -0.071              |
| <b>HbA1c</b>                                       | -0.113                     | 0.049               |
| <b>LDL-c</b>                                       | -0.207*                    | 0.049               |
| <b>Systolic blood pressure</b>                     | 0.027                      | -0.075              |
| <b>Diastolic blood pressure</b>                    | 0.048                      | -0.13               |
| <b>eGFR</b>                                        | -0.336**                   | -0.009              |
| <b>Triglycerides</b>                               | -0.124                     | 0.080               |
| <b>NT-proBNP</b>                                   | 0.114                      | -0.239              |
| <b>BMI</b>                                         | -0.004                     | 0.069               |
| <b>Statin treatment</b>                            | 0.175                      | -0.020              |
| <b>LDL-c, mean time-weighted</b>                   | -0.056                     |                     |
| <b>HbA1c, mean time-weighted</b>                   | -0.068                     |                     |
| <b>Systolic blood pressure, mean time-weighted</b> | 0.136                      |                     |
| <b>Diabetes duration</b>                           | 0.152                      |                     |

**Supplementary table 4:** Odds ratios (OR) and 95% confidence interval (CI) of significant stenosis on CT (>50%) or obstructive CAD/CHD, unadjusted and adjusted models, in the whole study population, the diabetes group and control group combined.

Model 1: Adjusted for diabetes/group, age, sex, eGFR and statin treatment.

|                                                                      |         | <b>I-FABP ng/ml</b> |                  | <b>P value</b> |
|----------------------------------------------------------------------|---------|---------------------|------------------|----------------|
| Significant stenosis on CT / nonsignificant stenosis on CT (n = 146) | Unadj   | OR (95 % CI)        | 2.15 (1.26-3.67) | 0.005          |
|                                                                      | Model 1 | OR (95 % CI)        | 1.95 (1.04-3.67) | 0.038          |
| Obstructive CAD/CHD / not obstructive CAD/CHD (n = 165)              | Unadj   | OR (95 % CI)        | 2.20 (1.40-3.45) | < 0.001        |
|                                                                      | Model 1 | OR (95 % CI)        | 1.84 (1.05-3.22) | 0.033          |

**Supplementary table 5:** Simple and multiple regression models for the association between I-FABP and Total Plaque Volume in the whole study population, the diabetes group and control group combined.

$r^2 = 0.474$ .  $n = 144$ .

| Total Plaque Volume (ln) | B    | Unadjusted 95 % CI | P value | B    | Adjusted 95 % CI | P value |
|--------------------------|------|--------------------|---------|------|------------------|---------|
| I-FABP                   | 2.33 | (1.51-3.57)        | <0.001  | 1.64 | (1.13-2.39)      | 0.010   |
| Diabetes                 | 6.62 | (3.66-11.94)       | <0.001  | 4.48 | (2.57-7.83)      | <0.001  |
| Age                      | 1.07 | (1.03-1.13)        | 0.002   | 1.08 | (1.04-1.12)      | <0.001  |
| Sex                      | 4.43 | (2.40-8.19)        | <0.001  | 3.55 | (2.12-5.92)      | <0.001  |
| eGFR                     | 1.01 | (0.99-1.03)        | 0.236   | 1.00 | (0.99-1.02)      | 0.579   |
| Statin treatment         | 5.08 | (2.63-9.81)        | <0.001  | 1.88 | (1.04-3.40)      | 0.035   |
